# Supplementary material for: Synthesis and characterization of water-soluble macrocyclic peptides stabilizing protein α-turn
Source: Royal Society of Chemistry journal article supplement (doi:10.1039/c7ob02852k), 2017-12-14
Supplement: c7ob02852k1.pdf [file c7ob02852k1.pdf]

## Synthesis and characterization of water-soluble macrocyclic peptides stabilizing protein $\alpha$ -turn

Lei Wang,<sup>a</sup> Pascale Coric,<sup>b</sup> Kexin Zhu,<sup>a</sup> Wang-Qing Liu,<sup>a</sup> Michel Vidal,<sup>a,c</sup> Serge Bouaziz,<sup>b,\*</sup>  
Sylvain Broussy<sup>a,\*</sup>

[a] UMR COMETE 8638 CNRS, Université Paris Descartes, Faculté de Pharmacie de Paris, Sorbonne Paris Cité, 4 av. de l'Observatoire, Paris 75006, France

E-mail: [sylvain.broussy@parisdescartes.fr](mailto:sylvain.broussy@parisdescartes.fr)

[b] UMR 8015 CNRS, Université Paris Descartes, Faculté de Pharmacie de Paris, Sorbonne Paris Cité 4 av. de l'Observatoire, Paris 75006, France

E-mail: [serge.bouaziz@parisdescartes.fr](mailto:serge.bouaziz@parisdescartes.fr)

[c] UF Pharmacocinétique et Pharmacochimie Hôpital Cochin, AP-HP 27 rue du Faubourg Saint Jacques, Paris 75014, France

### Table of Contents

|                                                                                       |    |
|---------------------------------------------------------------------------------------|----|
| HPLC chromatograms of peptides <b>1-8</b> , <b>9a</b> and <b>10a-c</b>                | 2  |
| CD spectra of <b>10a</b> and <b>11</b> with and without added TFE                     | 4  |
| NMR spectra and attribution tables of peptides <b>9a</b> , <b>10a-c</b> and <b>11</b> | 5  |
| Variable temperature <sup>1</sup> H NMR data for peptides <b>10a-c</b> and <b>11</b>  | 15 |
| NOE distance restraints                                                               | 18 |
| NOE connectivity and CSI for <b>10a</b> and <b>10c</b>                                | 26 |
| Overlap of <b>10c_down</b> with the NMR structure of <b>10c</b>                       | 26 |
| Catalyst parameters input file                                                        | 26 |
| Molecular modeling of <b>10a-c_cis</b> conformers                                     | 27 |

Supporting Information

HPLC chromatograms of peptides **1-8a** (AA<sub>1</sub> = AA<sub>3</sub> = Gly).

See the experimental section for details. Gradient conditions: 30-100% B in 30 min for **1-7** and 15-50% B in 30 min for **8a**.

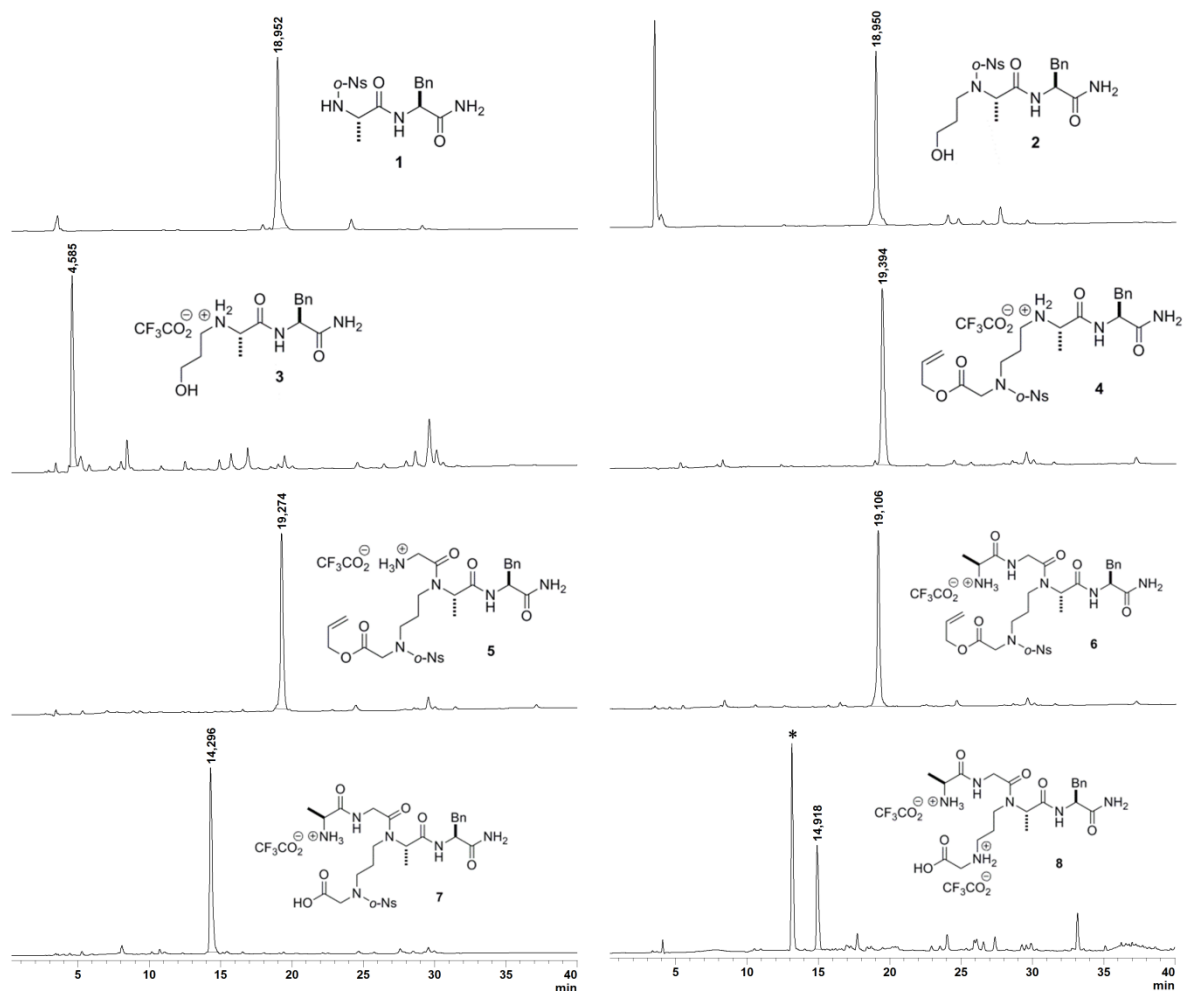

\*Denotes a non-peptide side product.

HPLC chromatograms of peptides **9a**, **10a**, **10b** and **10c**.

See the experimental section for details. Gradient conditions: 30-100% in 30 min for **9a**, **10b** and **10c**; 15-50% B in 30 min for **10a**.

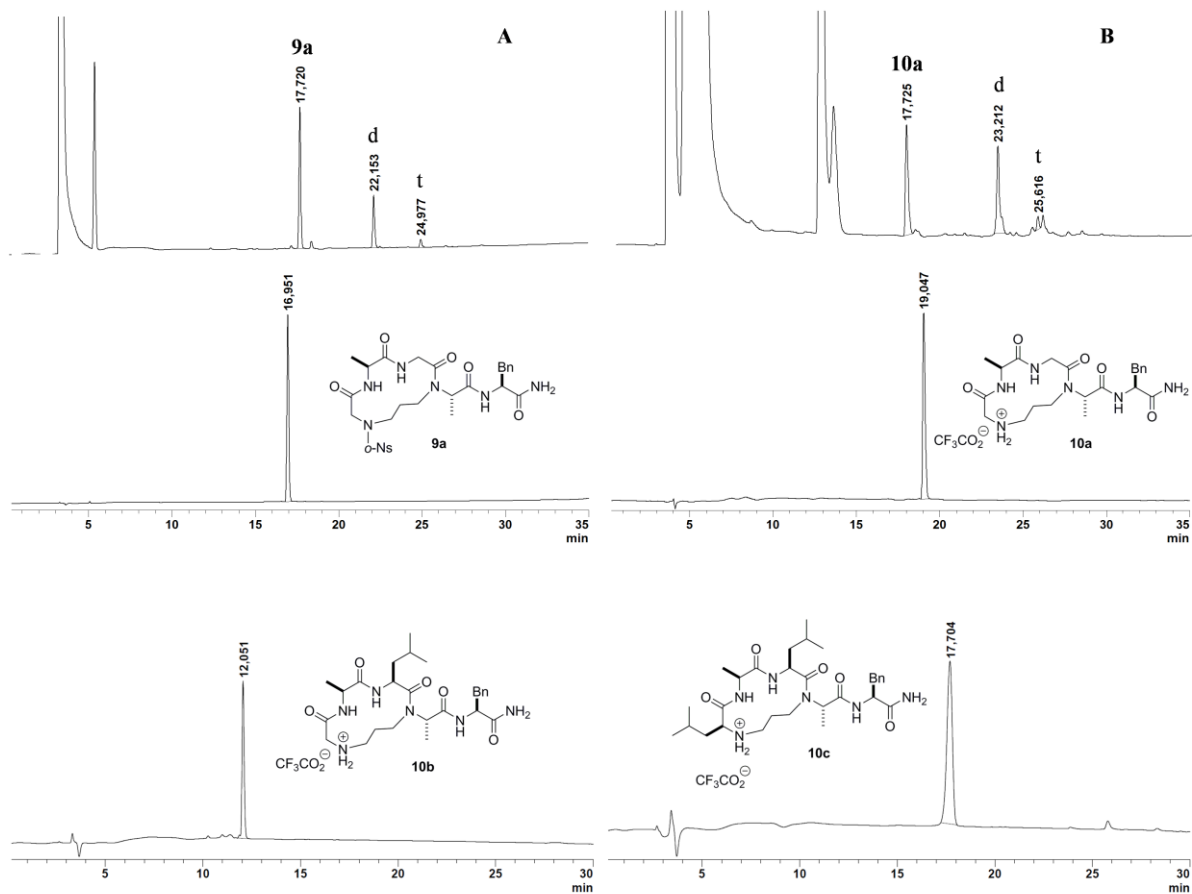

**A** and **B** are crude chromatograms of cyclization reactions of 10 mM solutions of **7** and **8** respectively.  
d: dimer; t: trimer.

*Supporting Information*

CD spectra of peptides **10a** and **11** in 10 mM phosphate buffer pH 7.4 without (blue and black) and with (red and green) 30% TFE, at 293 K.

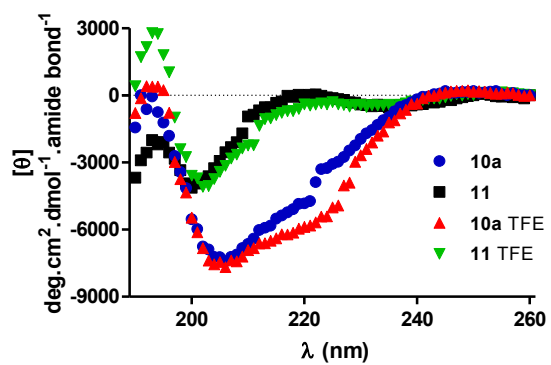

NMR spectra of peptide **9a**.

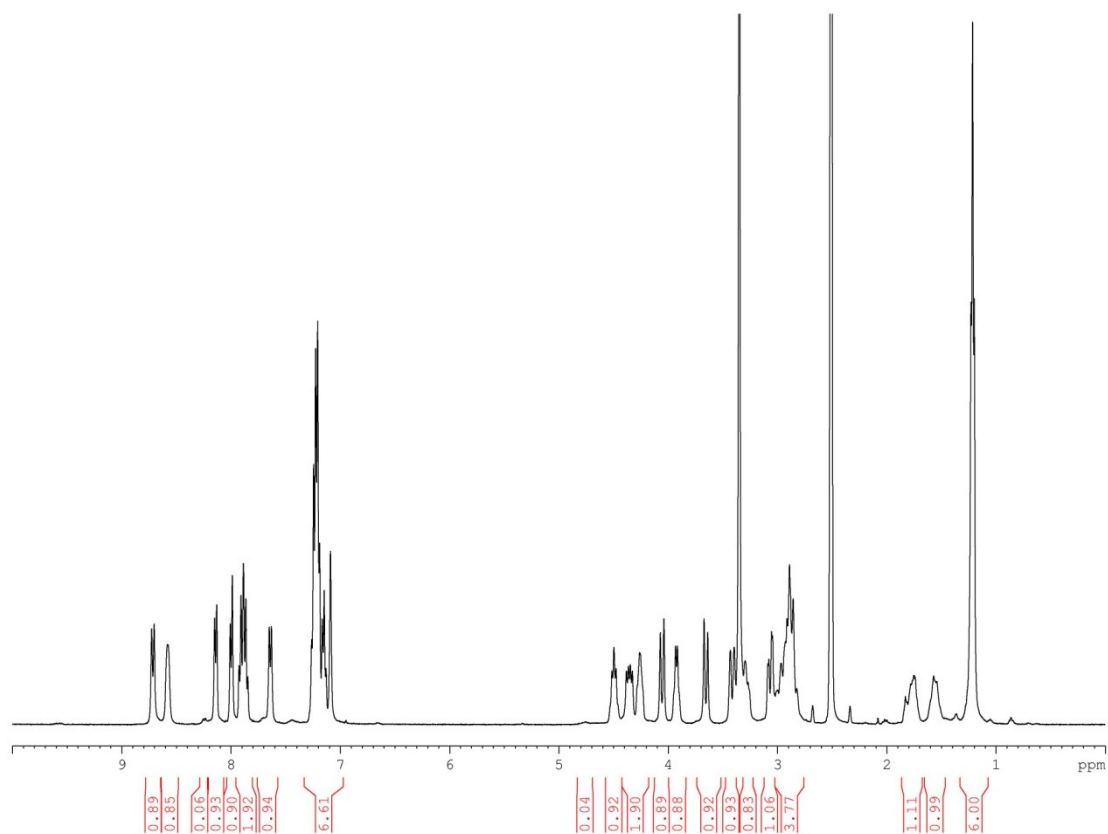

$^1\text{H}$  NMR spectrum of peptide **9a** (400 MHz,  $d_6$ -DMSO).

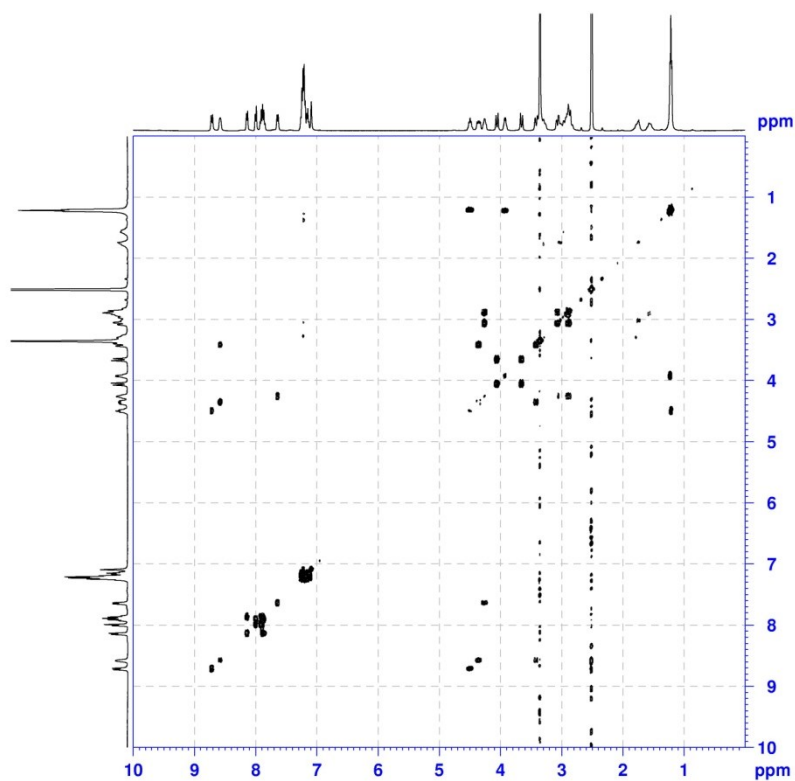

COSY spectrum of peptide **9a** ( $^1\text{H}$ , 400 MHz,  $d_6$ -DMSO).

Supporting Information

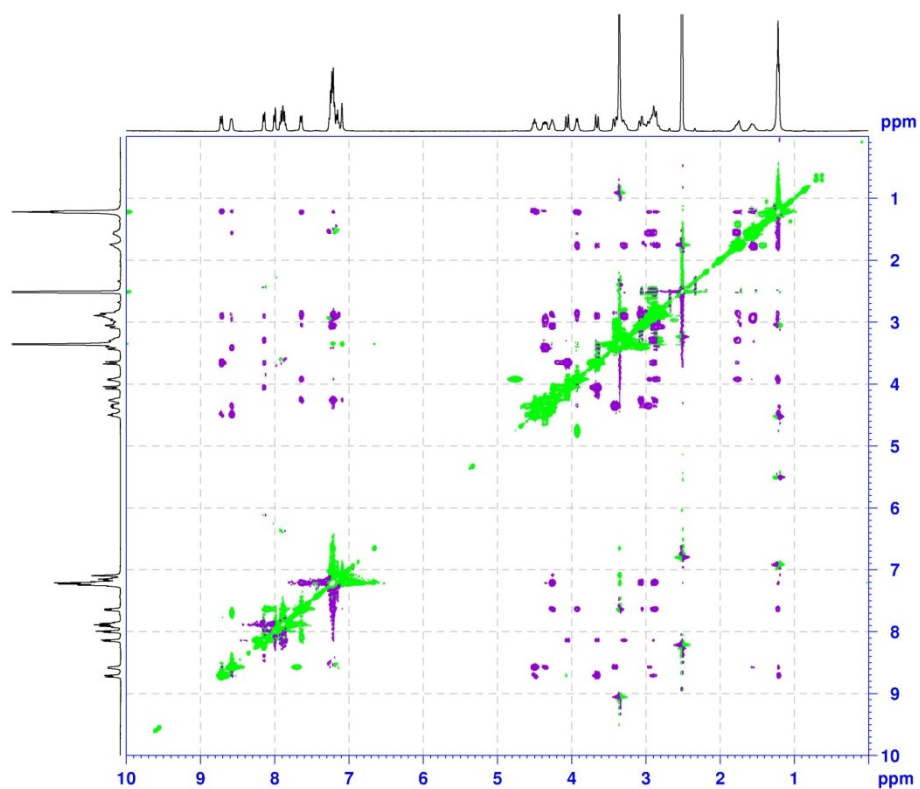

ROESY spectrum of peptide **9a** ( $^1\text{H}$ , 400 MHz,  $d_6$ -DMSO).

Attribution table for peptide **9a** (chemical shifts extracted from the ROESY spectrum).

|                              | NH   | H <sub><math>\alpha</math></sub> | H <sub><math>\beta</math></sub> | H <sub>arom</sub>            | C <sub>ter</sub> -NH <sub>2</sub> | 1,1'         | 2,2'         | 3,3'         |
|------------------------------|------|----------------------------------|---------------------------------|------------------------------|-----------------------------------|--------------|--------------|--------------|
| <b>G1</b><br>( <i>o</i> -Ns) | -    | 3.66<br>4.05                     | -                               | 7.86<br>7.91<br>8.00<br>8.14 | -                                 | -            | -            | -            |
| <b>A2</b>                    | 8.72 | 4.50                             | 1.20                            | -                            | -                                 | -            | -            | -            |
| <b>G3</b>                    | 8.58 | 3.41<br>4.35                     | -                               | -                            | -                                 | -            | -            | -            |
| <b>A4</b>                    | -    | 3.92                             | 1.22                            | -                            | -                                 | 2.89<br>3.28 | 1.55<br>1.74 | 2.95<br>3.02 |
| <b>F5</b>                    | 7.64 | 4.26                             | 2.88<br>3.06                    | 7.13-7.26                    | 7.09                              | -            | -            | -            |

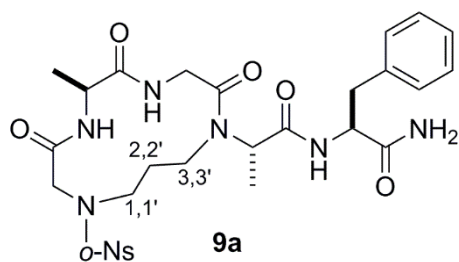

NMR spectra of peptide **10a**.

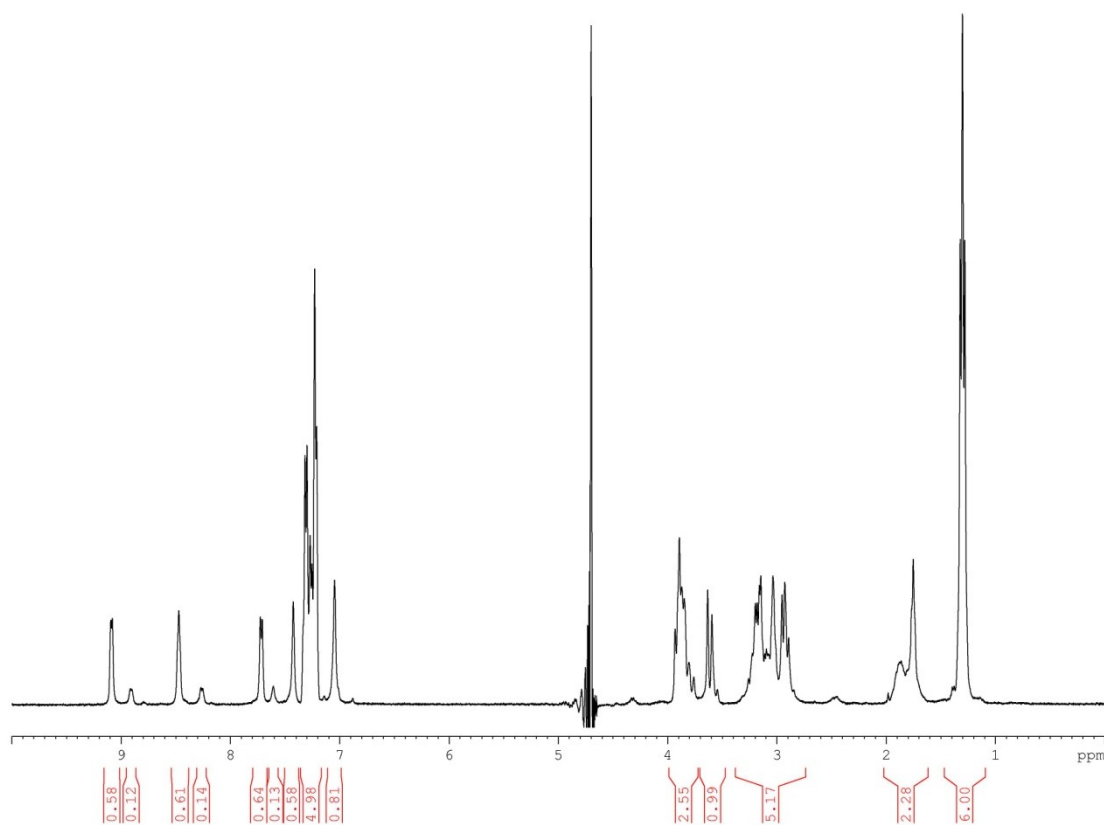

$^1\text{H}$  NMR spectrum of peptide **10a** (400 MHz,  $\text{H}_2\text{O}/\text{D}_2\text{O}$  9:1).

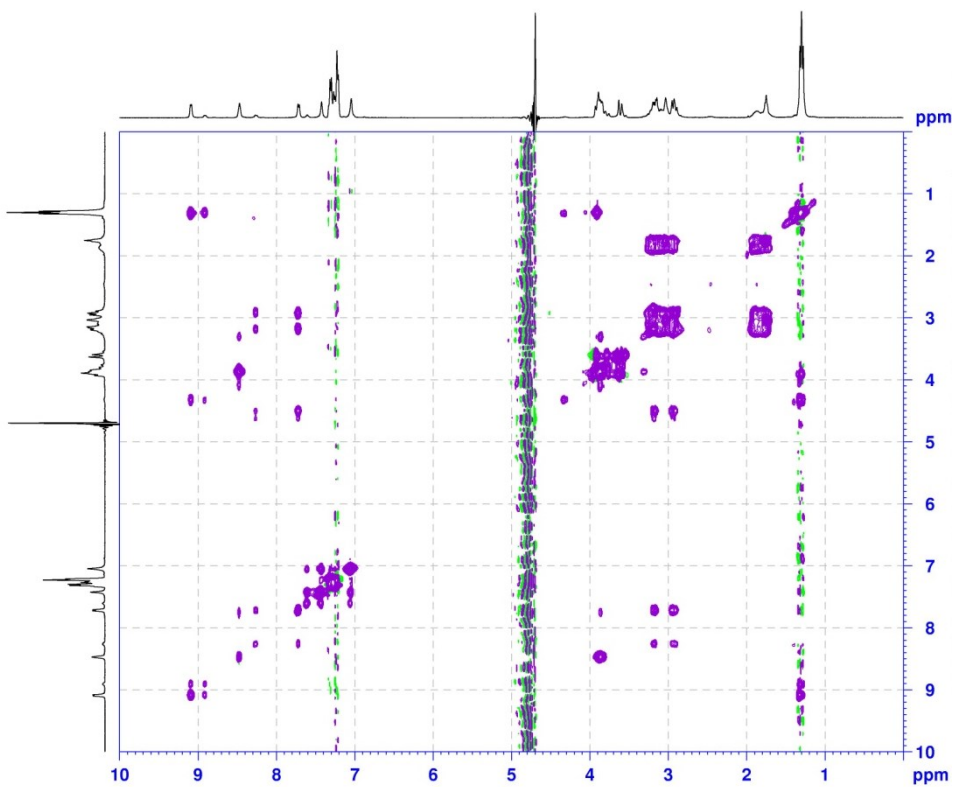

TOCSY spectrum of peptide **10a** ( $^1\text{H}$ , 400 MHz,  $\text{H}_2\text{O}/\text{D}_2\text{O}$  9:1).

Supporting Information

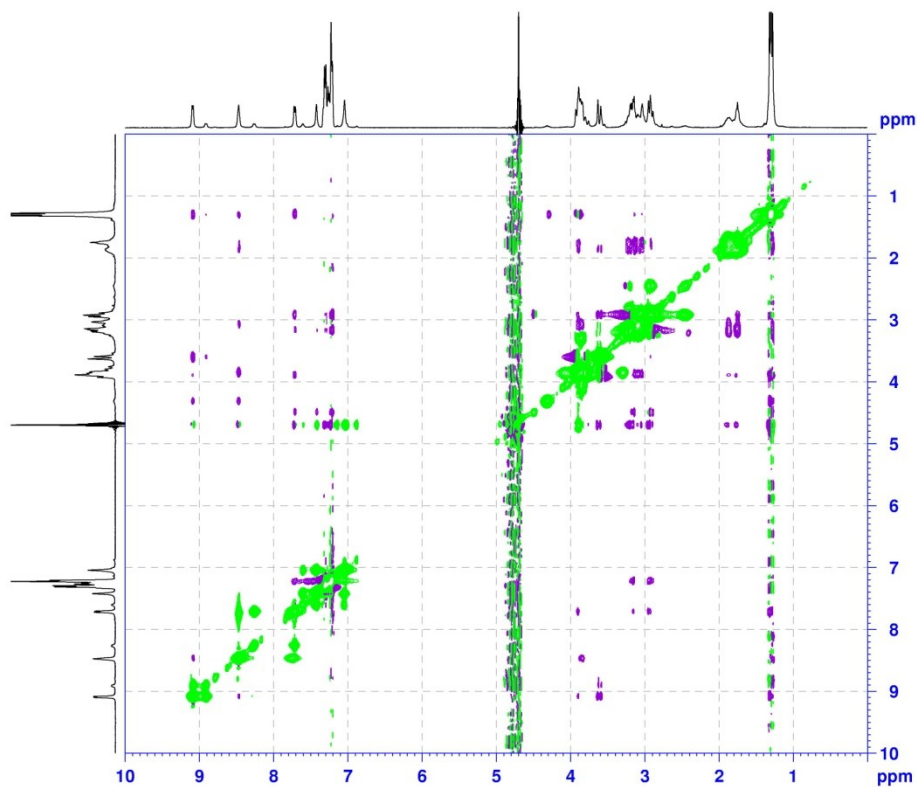

NOESY spectrum of peptide **10a** ( $^1\text{H}$ , 400 MHz,  $\text{H}_2\text{O}/\text{D}_2\text{O}$  9:1).

Attribution table for peptide **10a** (major rotamer, chemical shifts extracted from the NOESY spectrum).

|           | NH   | H <sub><math>\alpha</math></sub> | H <sub><math>\beta</math></sub> | H <sub>arom</sub> | C <sub>ter</sub> -NH <sub>2</sub> | 1,1'          | 2,2'         | 3,3'          |
|-----------|------|----------------------------------|---------------------------------|-------------------|-----------------------------------|---------------|--------------|---------------|
| <b>G1</b> | -    | 3.60<br>3.89                     | -                               | -                 | -                                 | -             | -            | -             |
| <b>A2</b> | 9.09 | 4.31                             | 1.30                            | -                 | -                                 | -             | -            | -             |
| <b>G3</b> | 8.47 | 3.84                             | -                               | -                 | -                                 | -             | -            | -             |
| <b>A4</b> | -    | 3.89                             | 1.29                            | -                 | -                                 | 2.85-<br>3.25 | 1.75<br>1.86 | 2.95-<br>3.15 |
| <b>F5</b> | 7.71 | 4.48                             | 2.91<br>3.16                    | 7.21-<br>7.33     | 7.04<br>7.42                      | -             | -            | -             |

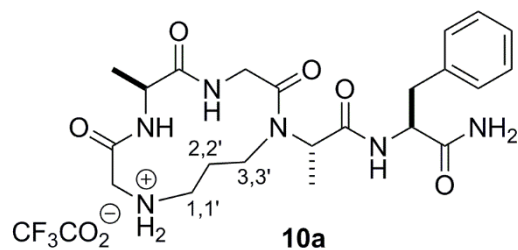



NMR spectra of peptide **10b**.

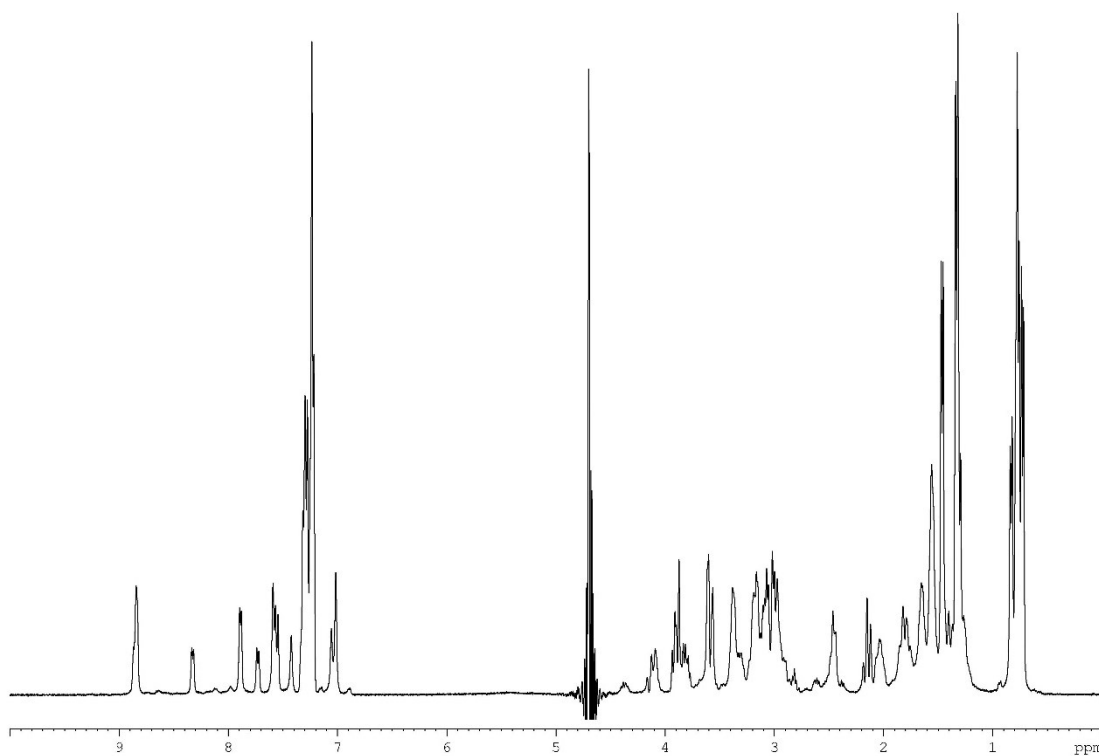

$^1\text{H}$  NMR spectrum of peptide **10b** (400 MHz,  $\text{H}_2\text{O}/\text{D}_2\text{O}$  9:1).

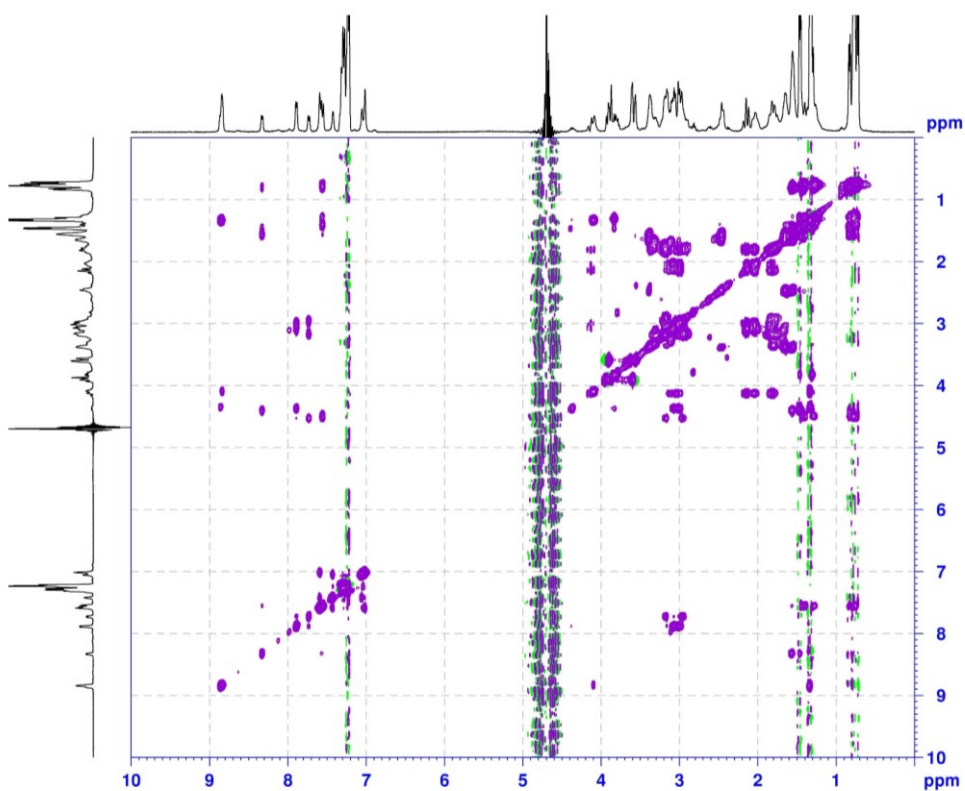

TOCSY spectrum of peptide **10b** ( $^1\text{H}$ , 400 MHz,  $\text{H}_2\text{O}/\text{D}_2\text{O}$  9:1).

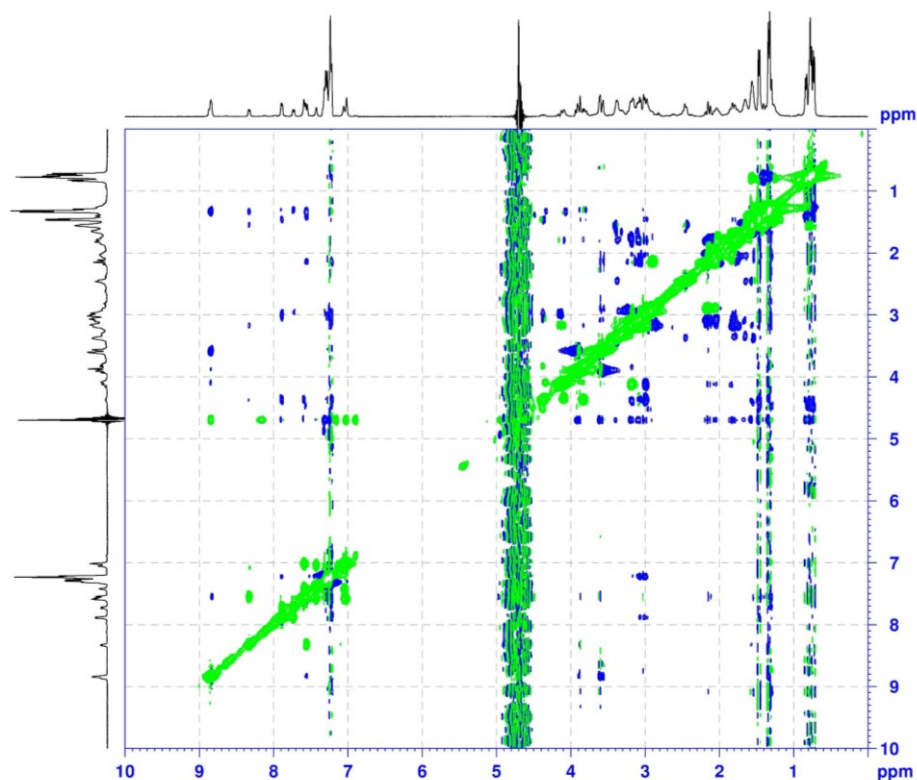

NOESY spectrum of peptide **10b** ( $^1\text{H}$ , 400 MHz,  $\text{H}_2\text{O}/\text{D}_2\text{O}$  9:1).

Attribution table for peptide **10b** (major rotamer, chemical shifts extracted from the NOESY spectrum).

|           | NH   | $\text{H}_\alpha$ | $\text{H}_\beta$ | $\text{H}_\gamma$ | $\text{H}_\delta$ | $\text{H}_{\text{arom}}$ | $\text{C}_{\text{ter}}\text{-NH}_2$ | 1,1'      | 2,2'         | 3,3'          |
|-----------|------|-------------------|------------------|-------------------|-------------------|--------------------------|-------------------------------------|-----------|--------------|---------------|
| <b>G1</b> | -    | 3.58<br>3.88      | -                | -                 | -                 | -                        | -                                   | -         | -            | -             |
| <b>A2</b> | 8.84 | 4.09              | 1.33             | -                 | -                 | -                        | -                                   | -         | -            | -             |
| <b>L3</b> | 7.56 | 4.47              | 1.39             | 1.27              | 0.78              | -                        | -                                   | -         | -            | -             |
| <b>A4</b> | -    | 3.83              | 1.30             | -                 | -                 | -                        | -                                   | 2.14<br>? | 1.81<br>2.03 | 2.88-<br>3.36 |
| <b>F5</b> | 7.89 | 4.36              | 3.01<br>3.09     | -                 | -                 | 7.21-<br>7.34            | 7.02<br>7.59                        | -         | -            | -             |

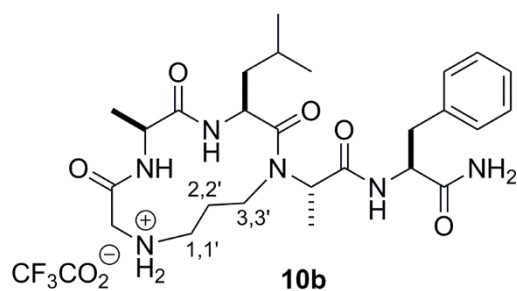

NMR spectra of peptide **10c**.

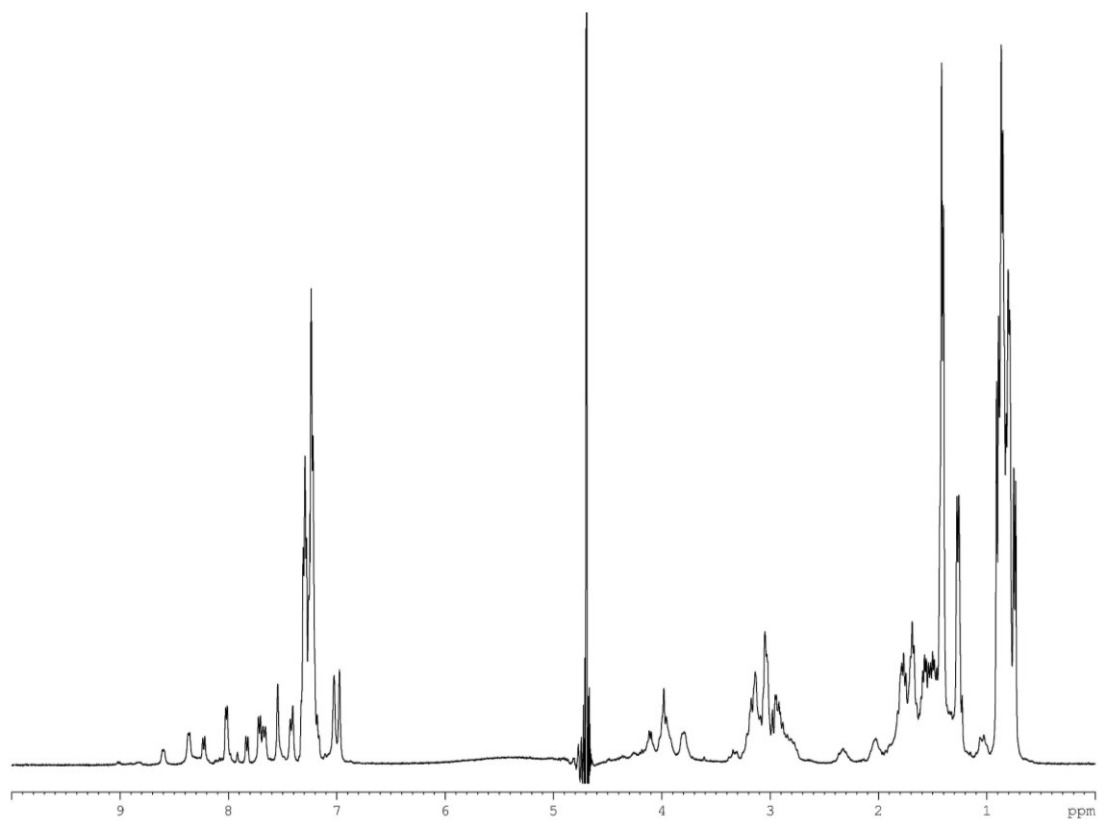

<sup>1</sup>H NMR spectrum of peptide **10c** (400 MHz, H<sub>2</sub>O/D<sub>2</sub>O 9:1).

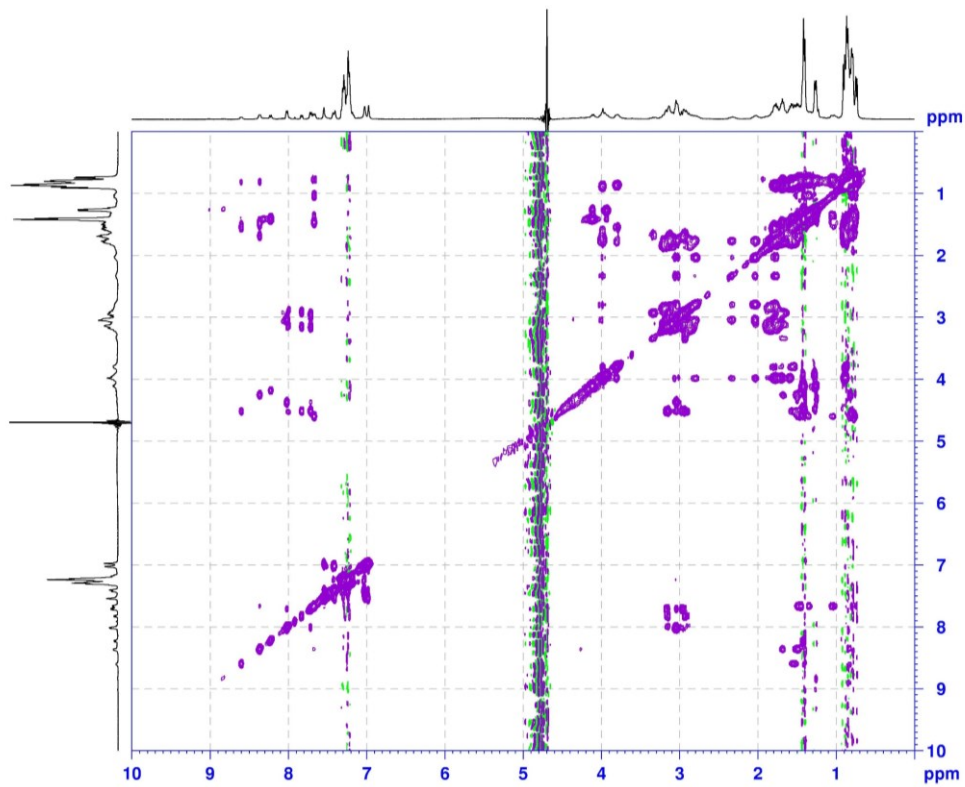

TOCSY spectrum of peptide **10c** (<sup>1</sup>H, 400 MHz, H<sub>2</sub>O/D<sub>2</sub>O 9:1).

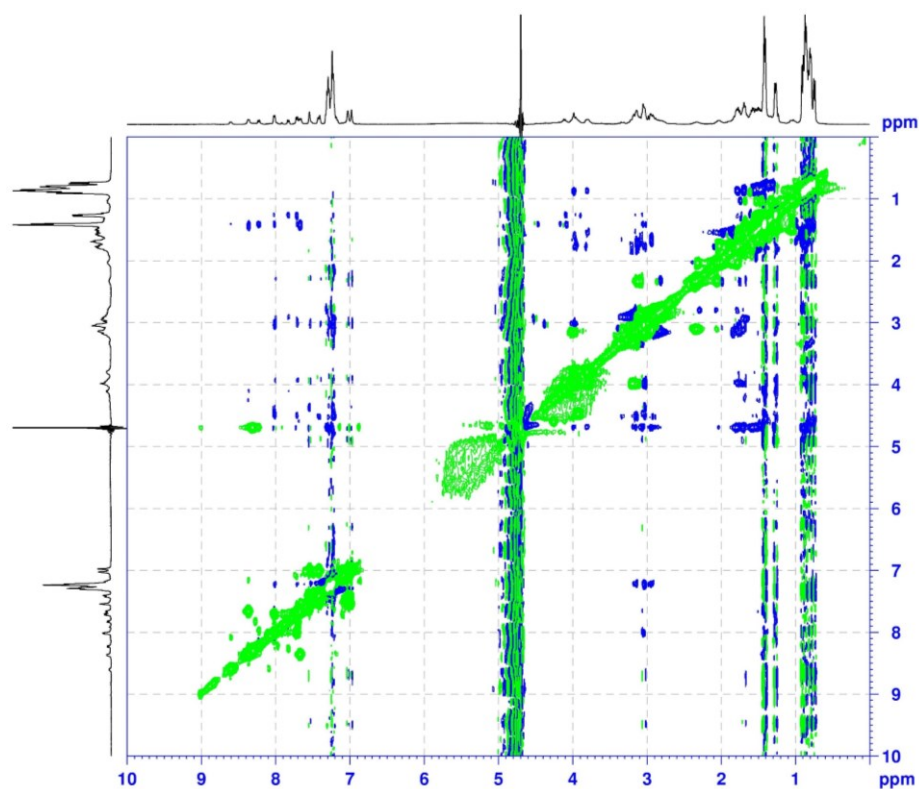NOESY spectrum of peptide **10c** ( $^1\text{H}$ , 400 MHz,  $\text{H}_2\text{O}/\text{D}_2\text{O}$  9:1).Attribution table for peptide **10c** (major rotamer, chemical shifts extracted from the NOESY spectrum).

|           | NH   | $\text{H}_\alpha$ | $\text{H}_\beta$ | $\text{H}_\gamma$ | $\text{H}_\delta$ | $\text{H}_{\text{arom}}$ | $\text{C}_{\text{ter}}\text{-NH}_2$ | 1,1'         | 2,2'         | 3,3'         |
|-----------|------|-------------------|------------------|-------------------|-------------------|--------------------------|-------------------------------------|--------------|--------------|--------------|
| <b>L1</b> | -    | 4.05              | 1.66<br>1.75     | ?                 | 0.94              | -                        | -                                   | -            | -            | -            |
| <b>A2</b> | 8.30 | 4.24              | 1.47             | -                 | -                 | -                        | -                                   | -            | -            | -            |
| <b>L3</b> | 8.67 | 4.58              | 1.57<br>1.63     | 1.46              | 0.88              | -                        | -                                   | -            | -            | -            |
| <b>A4</b> | -    | 4.01              | 1.33             | -                 | -                 | -                        | -                                   | 3.10<br>4.05 | 1.84<br>2.10 | 2.38<br>2.85 |
| <b>F5</b> | 7.78 | 4.58              | 3.02<br>3.24     | -                 | -                 | -                        | 7.34<br>7.52                        | -            | -            | -            |

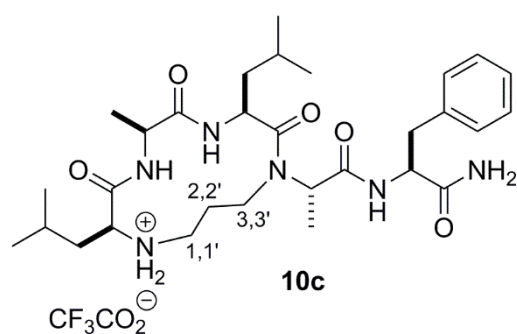

NMR spectra of peptide **11**.

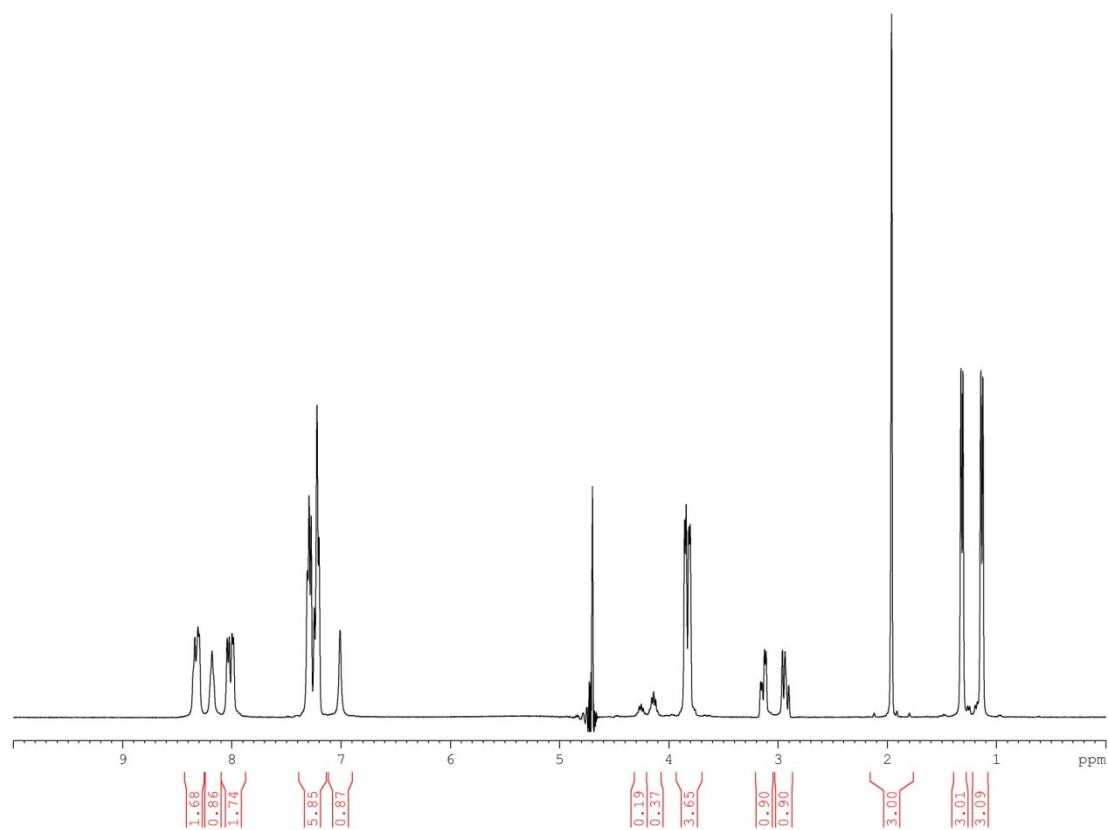

<sup>1</sup>H NMR spectrum of peptide **11** (400 MHz, H<sub>2</sub>O/D<sub>2</sub>O 9:1).

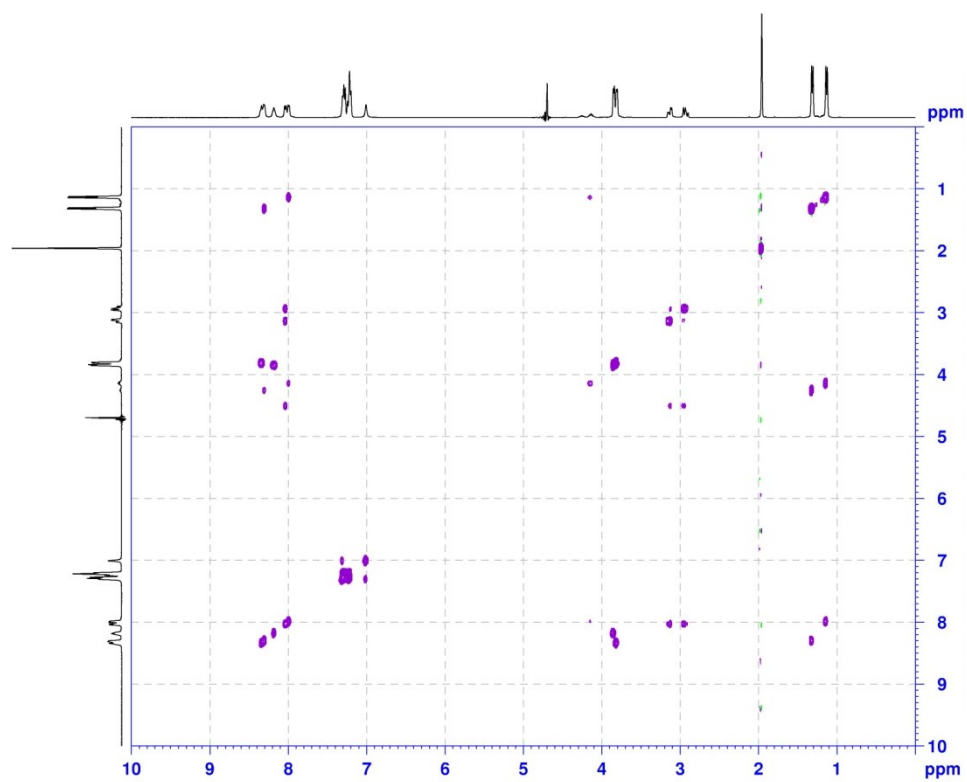

TOCSY spectrum of peptide **11** (<sup>1</sup>H, 400 MHz, H<sub>2</sub>O/D<sub>2</sub>O 9:1).

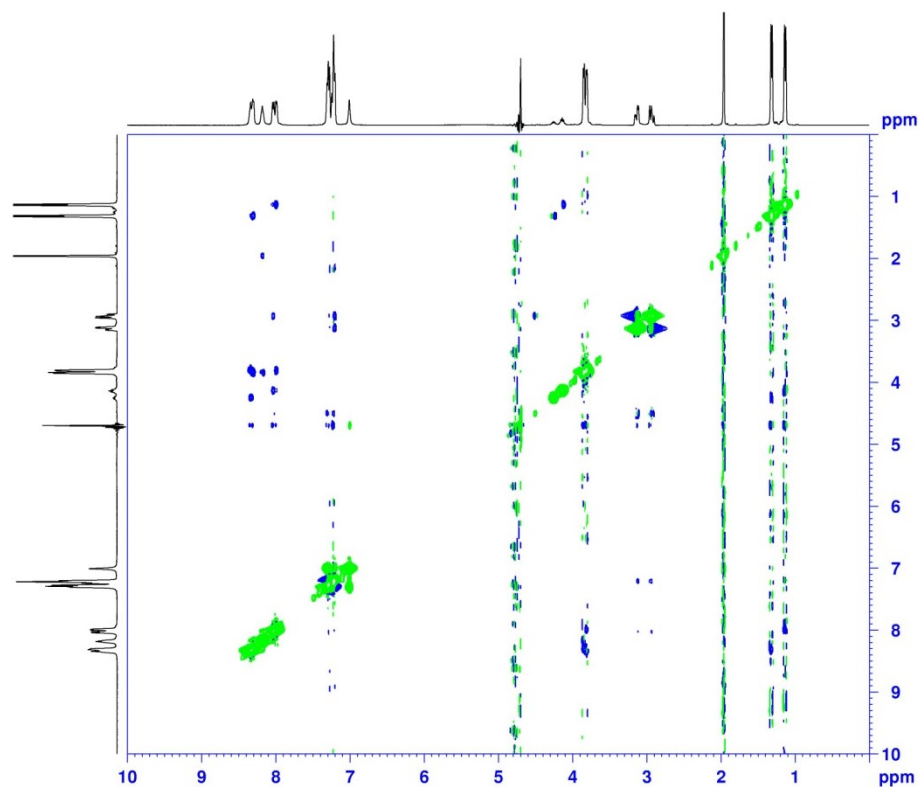

NOESY spectrum of peptide **11** ( $^1\text{H}$ , 400 MHz,  $\text{H}_2\text{O}/\text{D}_2\text{O}$  9:1).

Attribution table for peptide **11**, Ac-GAGAF-NH<sub>2</sub> (chemical shifts extracted from the NOESY spectrum).

|           | NH   | H <sub><math>\alpha</math></sub> | H <sub><math>\beta</math></sub> | H <sub>arom</sub> | C <sub>ter</sub> -NH <sub>2</sub> | N <sub>ter</sub> -Ac |
|-----------|------|----------------------------------|---------------------------------|-------------------|-----------------------------------|----------------------|
| <b>G1</b> | 8.18 | 3.85                             | -                               | -                 | -                                 | 1.96                 |
| <b>A2</b> | 8.30 | 4.24                             | 1.32                            | -                 | -                                 | -                    |
| <b>G3</b> | 8.34 | 3.80                             | -                               | -                 | -                                 | -                    |
| <b>A4</b> | 7.99 | 4.13                             | 1.13                            | -                 | -                                 | -                    |
| <b>F5</b> | 8.03 | 4.50                             | 2.93<br>3.12                    | 7.20-7.31         | 7.01                              | -                    |

Variable temperature  $^1\text{H}$  NMR data for peptides **10a-c** and **11**.

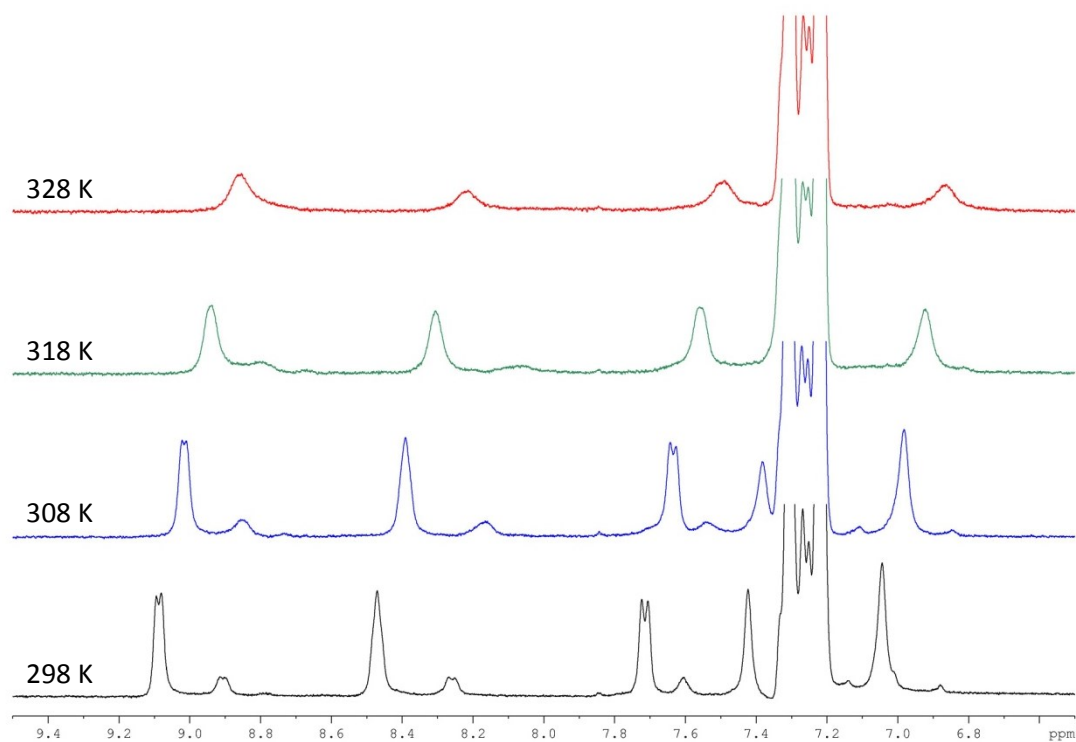

Amide region of the  $^1\text{H}$  NMR spectra of peptide **10a** at the indicated temperatures (400 MHz,  $\text{H}_2\text{O}/\text{D}_2\text{O}$  9:1).

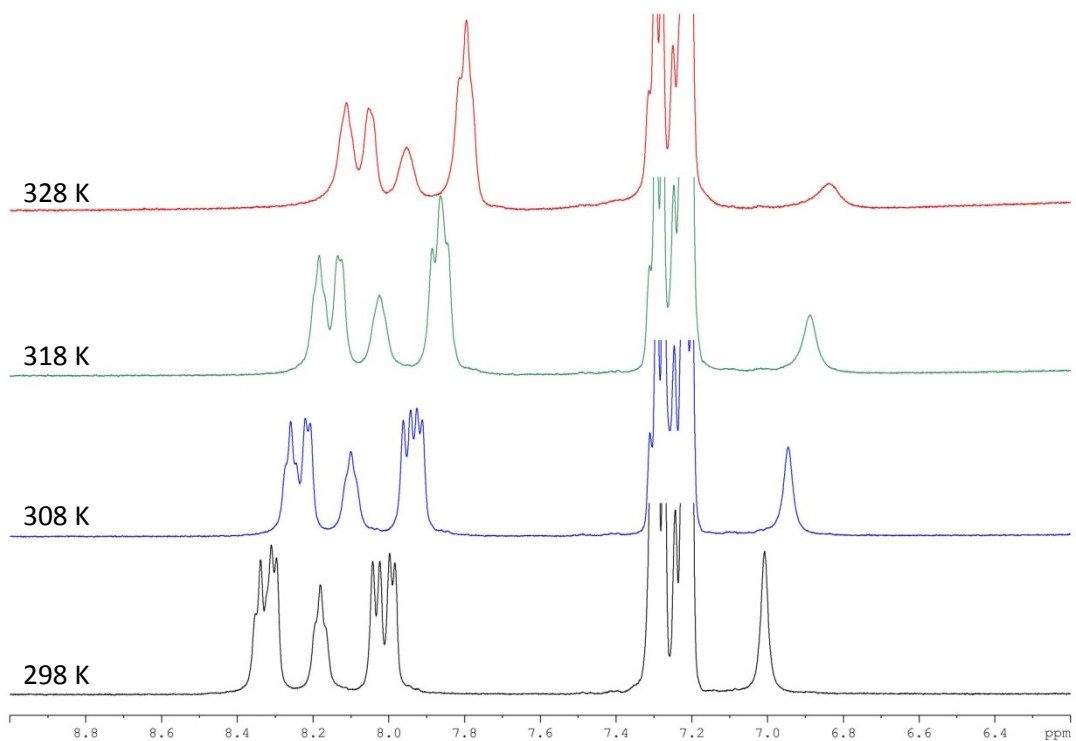

Amide region of the  $^1\text{H}$  NMR spectra of peptide **11** at the indicated temperatures (400 MHz,  $\text{H}_2\text{O}/\text{D}_2\text{O}$  9:1).

Supporting Information

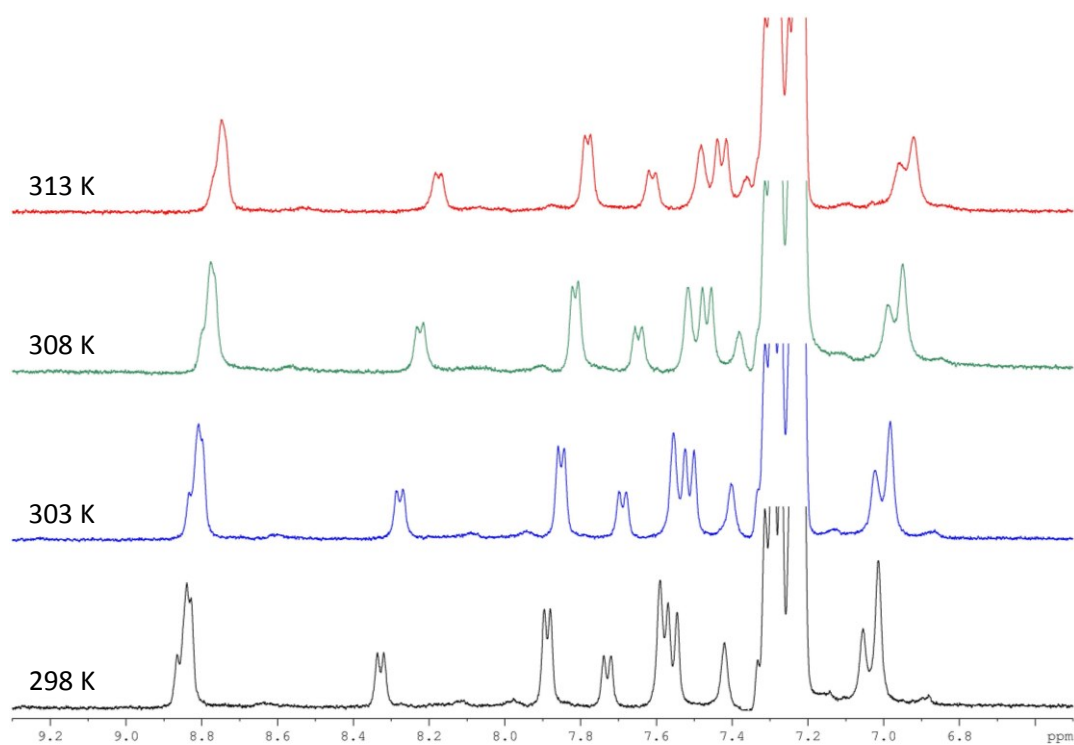

Amide region of the  $^1\text{H}$  NMR spectra of peptide **10b** at the indicated temperatures (400 MHz,  $\text{H}_2\text{O}/\text{D}_2\text{O}$  9:1).

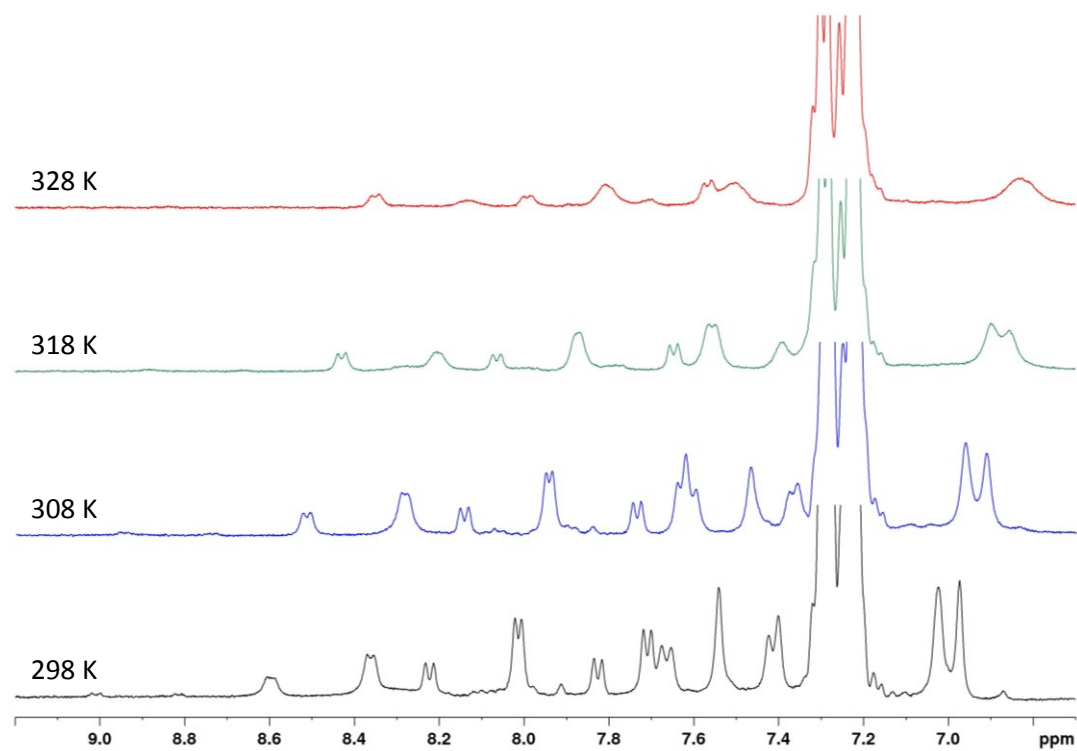

Amide region of the  $^1\text{H}$  NMR spectra of peptide **10c** at the indicated temperatures (400 MHz,  $\text{H}_2\text{O}/\text{D}_2\text{O}$  9:1).



## Supporting Information

Graphical representation of the dependence of amide protons chemical shifts on temperature for peptides **11** (left) and **10a** (right, major rotamer only).

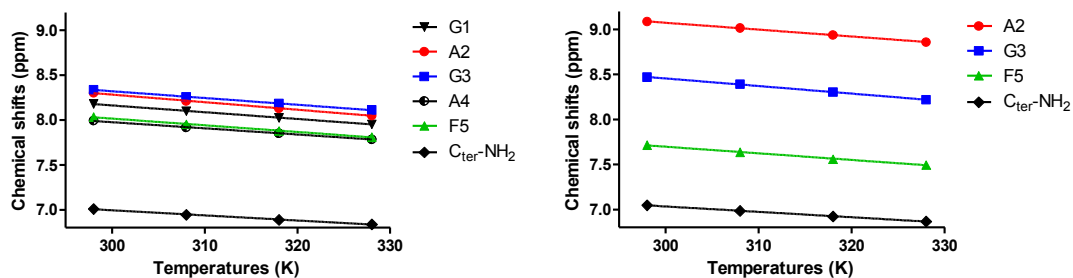

Corresponding slope values with standard errors:

| Peptide 11                        | Slope (ppb/K)  |
|-----------------------------------|----------------|
| G1                                | $-7.6 \pm 0.2$ |
| A2                                | $-8.4 \pm 0.2$ |
| G3                                | $-7.6 \pm 0.2$ |
| A4                                | $-6.8 \pm 0.2$ |
| F5                                | $-7.4 \pm 0.2$ |
| C <sub>ter</sub> -NH <sub>2</sub> | $-5.7 \pm 0.2$ |

| Peptide 10a                       | Slope (ppb/K)  |
|-----------------------------------|----------------|
| A2                                | $-7.6 \pm 0.2$ |
| G3                                | $-8.4 \pm 0.2$ |
| F5                                | $-7.4 \pm 0.3$ |
| C <sub>ter</sub> -NH <sub>2</sub> | $-6.0 \pm 0.1$ |

*Supporting Information*

NOE derived distance restraints used for calculating the solution structure of the major rotamer of **10a**. Values were calculated using the CcpNmr software.<sup>[1]</sup>

| GAGAF_RS5modif_run4A1 |      | Distances (lower and upper distance errors) |
|-----------------------|------|---------------------------------------------|
| 4ha                   | 4hg1 | 3.5 1.0 0.7                                 |
| 4ha                   | 4hd1 | 3.3 0.8 0.7                                 |
| 4ha                   | 4he1 | 4.2 0.8 0.8                                 |
| 4ha                   | 4hd2 | 3.2 0.6 0.6                                 |
| 4ha                   | 4hb# | 3.4 0.7 0.7                                 |
| 1ha2                  | 1ha1 | 3.3 1.4 0.7                                 |
| 5hn                   | 4ha  | 3.1 0.6 0.6                                 |
| 4ha                   | 4hg2 | 3.3 0.7 0.7                                 |
| 4ha                   | 4he2 | 4.1 0.8 0.8                                 |
| 5hb1                  | 5hb2 | 2.2 0.4 0.4                                 |
| 5hn                   | 5hb2 | 3.0 0.6 0.6                                 |
| 5h1                   | 5hb2 | 2.7 0.2 2.3                                 |
| 5hb2                  | 4hd1 | 3.9 0.8 1.1                                 |
| 5hb2                  | 4hd2 | 4.4 0.9 0.9                                 |
| 5hn                   | 5hb1 | 3.5 0.7 0.7                                 |
| 5hb1                  | 4hd1 | 4.3 0.9 0.9                                 |
| 5h1                   | 5hb1 | 2.7 0.2 2.3                                 |
| 5hb1                  | 4hd2 | 3.9 0.8 1.1                                 |
| 5h1                   | 5ha  | 2.8 0.6 0.6                                 |
| 5hn                   | 5ha  | 3.1 0.6 0.6                                 |
| 5h2                   | 5ha  | 3.2 0.7 1.8                                 |
| 4hd2                  | 4hb# | 4.4 0.9 0.9                                 |
| 5hn                   | 4hb# | 3.3 0.7 0.7                                 |
| 4hd1                  | 4hb# | 4.4 0.9 0.9                                 |
| 5hn                   | 5h2  | 3.8 0.8 1.2                                 |
| 5hn                   | 5h1  | 3.5 0.7 0.7                                 |
| 1ha1                  | 4hd1 | 4.6 0.9 0.9                                 |
| 4hg1                  | 4hd1 | 4.5 1.8 0.9                                 |
| 3hn                   | 4hd1 | 3.8 0.8 0.8                                 |
| 4hg2                  | 4hd1 | 4.7 2.0 0.9                                 |
| 4hg1                  | 4hd2 | 2.8 0.6 0.6                                 |
| 1ha1                  | 4hd2 | 5.1 1.0 0.9                                 |
| 4hg2                  | 4hd2 | 3.6 0.7 0.7                                 |
| 1ha1                  | 4he2 | 4.2 0.8 0.8                                 |
| 3hn                   | 4he2 | 4.6 0.9 0.9                                 |
| 5hn                   | 2hb# | 4.1 0.7 0.7                                 |
| 3hn                   | 4hg2 | 4.0 0.8 0.8                                 |
| 3hn                   | 4hg1 | 3.7 0.8 0.8                                 |
| 2hn                   | 1ha2 | 3.4 0.7 0.7                                 |
| 2hn                   | 2hb# | 3.2 0.7 0.7                                 |
| 2hn                   | 2ha  | 3.3 0.7 0.7                                 |
| 2hn                   | 1ha1 | 2.9 0.6 0.6                                 |
| 2hn                   | 3hn  | 3.4 1.0 0.7                                 |
| 3hn                   | 2ha  | 3.4 0.7 0.7                                 |

Supporting Information

|      |      |                          |
|------|------|--------------------------|
| 2ha  | 2hb# | 3.5 0.8 0.8              |
| 3hn  | 2hb# | 4.1 0.8 0.8              |
| 3hn  | 3ha* | 3.5 0.7 0.7              |
| 3ha2 | 4hg2 | 1.8 0.0 0.0 <sup>§</sup> |

# Methyl groups with degenerated protons.

\* Not stereospecifically assigned protons.

<sup>§</sup> The analysis of structures indicated the presence of a steric clash between these hydrogen atoms. Therefore, a distance of 1.8 Å was imposed for the final calculation.

Numbering of the hydrogen atoms of the covalent linker for XPLOR-NIH calculations:

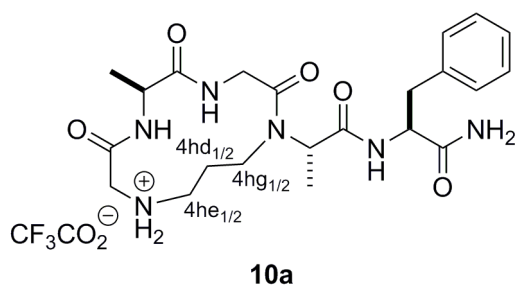

*Supporting Information*

NOE derived distance restraints used for calculating the solution structure of the major rotamer of **10a**. Values were set according to the NOE intensity as strong (2.6 Å), medium (3.5 Å), weak (5.0 Å) and very weak (6.0 Å).

| GAGAF_RS5modif_run4A1 |      | Distances (lower and upper distance errors) |
|-----------------------|------|---------------------------------------------|
| 4ha                   | 4hg1 | 5.0 3.2 0.0                                 |
| 4ha                   | 4hd1 | 5.0 3.2 0.0                                 |
| 4ha                   | 4he1 | 5.0 3.2 0.0                                 |
| 4ha                   | 4hd2 | 5.0 3.2 0.0                                 |
| 4ha                   | 4hb# | 5.0 3.2 0.0                                 |
| 1ha2                  | 1ha1 | 5.0 3.2 0.0                                 |
| 5hn                   | 4ha  | 5.0 3.2 0.0                                 |
| 4ha                   | 4hg2 | 5.0 3.2 0.0                                 |
| 4ha                   | 4he2 | 5.0 3.2 0.0                                 |
| 5hb1                  | 5hb2 | 2.6 0.8 0.0                                 |
| 5hn                   | 5hb2 | 5.0 3.2 0.0                                 |
| 5h1                   | 5hb2 | 5.0 3.2 0.0                                 |
| 5hb2                  | 4hd1 | 5.0 3.2 0.0                                 |
| 5hb2                  | 4hd2 | 6.0 4.2 0.0                                 |
| 5hn                   | 5hb1 | 5.0 3.2 0.0                                 |
| 5hb1                  | 4hd1 | 6.0 4.2 0.0                                 |
| 5h1                   | 5hb1 | 5.0 3.2 0.0                                 |
| 5hb1                  | 4hd2 | 5.0 3.2 0.0                                 |
| 5h1                   | 5ha  | 3.5 1.7 0.0                                 |
| 5hn                   | 5ha  | 5.0 3.2 0.0                                 |
| 5h2                   | 5ha  | 5.0 3.2 0.0                                 |
| 4hd2                  | 4hb# | 6.0 4.2 0.0                                 |
| 5hn                   | 4hb# | 5.0 3.2 0.0                                 |
| 4hd1                  | 4hb# | 6.0 4.2 0.0                                 |
| 5hn                   | 5h2  | 5.0 3.2 0.0                                 |
| 5hn                   | 5h1  | 5.0 3.2 0.0                                 |
| 1ha1                  | 4hd1 | 6.0 4.2 0.0                                 |
| 4hg1                  | 4hd1 | 6.0 4.2 0.0                                 |
| 3hn                   | 4hd1 | 5.0 3.2 0.0                                 |
| 4hg2                  | 4hd1 | 6.0 4.2 0.0                                 |
| 4hg1                  | 4hd2 | 3.5 1.7 0.0                                 |
| 1ha1                  | 4hd2 | 6.0 4.2 0.0                                 |
| 4hg2                  | 4hd2 | 5.0 3.2 0.0                                 |
| 1ha1                  | 4he2 | 5.0 3.2 0.0                                 |
| 3hn                   | 4he2 | 6.0 4.2 0.0                                 |
| 5hn                   | 2hb# | 5.0 3.2 0.0                                 |
| 3hn                   | 4hg2 | 5.0 3.2 0.0                                 |
| 3hn                   | 4hg1 | 5.0 3.2 0.0                                 |
| 2hn                   | 1ha2 | 5.0 3.2 0.0                                 |
| 2hn                   | 2hb# | 5.0 3.2 0.0                                 |
| 2hn                   | 2ha  | 5.0 3.2 0.0                                 |
| 2hn                   | 1ha1 | 3.5 1.7 0.0                                 |

*Supporting Information*

|     |      |             |
|-----|------|-------------|
| 2hn | 3hn  | 5.0 3.2 0.0 |
| 3hn | 2ha  | 5.0 3.2 0.0 |
| 2ha | 2hb# | 5.0 3.2 0.0 |
| 3hn | 2hb# | 5.0 3.2 0.0 |
| 3hn | 3ha* | 5.0 3.2 0.0 |

# Methyl groups with degenerated protons.

\* Not stereospecifically assigned protons.

Supporting Information

NOE derived distance restraints used for calculating the solution structure of the major rotamer of **10c**. Values were calculated using the CcpNmr software.<sup>[1]</sup>

| LALAF_R1_run7A4 |             | Distances (lower and upper distance errors) |
|-----------------|-------------|---------------------------------------------|
| 4hg2            | 4he1        | 2.8 0.6 0.6                                 |
| 4hg2            | 4hd2        | 2.6 0.5 0.5                                 |
| 4hg2            | 4hd1        | 2.6 0.5 0.5                                 |
| 4hg2            | 4hg1        | 2.8 1.0 0.6                                 |
| 4he1            | 4hg1        | 3.2 0.6 0.6                                 |
| 1ht2            | 1ha or 4he1 | 2.9 0.6 0.6                                 |
| 1ha             | 1hd#*       | 2.5 0.5 0.5                                 |
| 4hd1            | 1hd#*       | 2.3 0.5 0.7                                 |
| 1hb2            | 1hd#*       | 2.3 0.5 0.7                                 |
| 1hb1            | 1hd#*       | 2.3 0.2 1.7                                 |
| 5hb2            | 5ha         | 2.4 0.5 0.5                                 |
| 5hn             | 5hb2        | 2.2 0.4 2.5                                 |
| 5hb1            | 5hb2        | 1.8 0.0 0.4                                 |
| 5h1             | 5hb2        | 2.1 0.3 0.4                                 |
| 1ha             | 1hb2        | 2.5 0.5 0.5                                 |
| 1ha             | 1hb1        | 2.0 0.2 0.4                                 |
| 2hb#            | 5ha         | 2.1 0.3 0.4                                 |
| 5hn             | 5ha         | 2.3 0.5 0.5                                 |
| 5hb1            | 5ha         | 2.6 0.5 0.5                                 |
| 5h1             | 5hb1        | 1.9 0.1 0.4                                 |
| 5hb1            | 2hb#        | 4.0 0.7 0.7                                 |
| 5hn             | 5hb1        | 2.5 0.5 2.0                                 |
| 5h2             | 5hb1        | 2.9 0.6 0.6                                 |
| 3hb1            | 3ha         | 2.4 0.5 0.5                                 |
| 3hn             | 3hb1        | 2.8 0.6 1.1                                 |
| 4hd2            | 4hd1        | 2.3 0.5 0.5                                 |
| 4he2            | 4hd2        | 2.9 0.6 0.6                                 |
| 4he1            | 4hd2        | 2.5 0.5 0.5                                 |
| 2hn             | 1ha         | 3.2 0.6 0.6                                 |
| 2hn             | 2ha         | 2.8 0.6 0.6                                 |
| 2hn             | 2hb#        | 2.3 0.5 0.5                                 |
| 3hn             | 2hn         | 3.0 0.6 0.6                                 |
| 2ha             | 2hb#        | 2.7 0.5 0.5                                 |
| 5hn             | 2hb#        | 2.8 0.6 0.6                                 |
| 3hb2            | 3hg         | 2.0 0.2 0.4                                 |
| 3hb2            | 3ha         | 2.4 0.5 0.5                                 |
| 5hn             | 5h2         | 3.1 0.6 0.6                                 |
| 5hn             | 4hb#        | 2.3 0.5 0.5                                 |
| 5hn             | 5h1         | 2.1 0.3 0.4                                 |
| 3hn             | 3hg         | 2.5 0.5 0.5                                 |
| 3hn             | 3ha         | 3.0 0.6 0.6                                 |
| 3hg             | 3ha         | 2.0 0.2 0.4                                 |
| 3hd1# ou 3hd2#  | 3ha         | 2.0 0.2 0.4                                 |
| 4he2            | 4he1        | 1.8 0.0 0.4                                 |

Supporting Information

|      |       |                          |
|------|-------|--------------------------|
| 4he1 | 4hd1  | 2.5 0.4 0.4              |
| 4he2 | 4hd1  | 2.5 0.4 0.4              |
| 5h2  | 5h1   | 1.9 0.1 0.4              |
| 4ha  | 4hb#  | 2.7 0.5 0.5              |
| 4he1 | 2hn   | 2.0 0.2 0.2 <sup>§</sup> |
| 4he2 | 3hn   | 2.0 0.2 0.2 <sup>§</sup> |
| 1n   | 1hd22 | 2.0 0.2 0.2 <sup>§</sup> |
| 4hg2 | 3ha   | 2.0 0.2 0.2 <sup>§</sup> |
| 4he1 | 1hd21 | 2.0 0.2 0.2 <sup>§</sup> |

# Methyl groups with degenerated protons.

\* Not stereospecifically assigned methyl groups.

<sup>§</sup> The analysis of structures indicated the presence of steric clashes between these hydrogen atoms. Therefore, distances of  $2.0 \pm 0.2 \text{ \AA}$  were imposed for the final calculation.

Numbering of the hydrogen atoms of the covalent linker for XPLOR-NIH calculations:

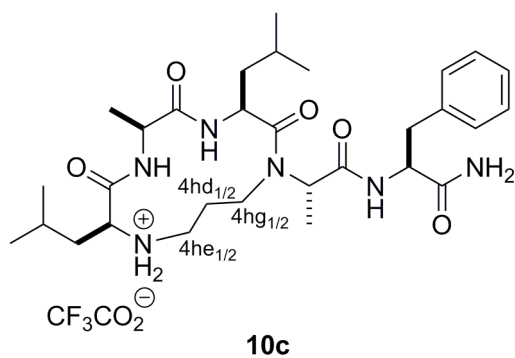

*Supporting Information*

NOE derived distance restraints used for calculating the solution structure of the major rotamer of **10c**. Values were set according to the NOE intensity as strong (2.7 Å), medium (3.5 Å), weak (5.0 Å) and very weak (6.0 Å).

| LALAF_R1_run7B3 |             | Distances (lower and upper distance errors) |
|-----------------|-------------|---------------------------------------------|
| 4hg2            | 4he1        | 3.5 1.7 0.0                                 |
| 4hg2            | 4hd2        | 3.5 1.7 0.0                                 |
| 4hg2            | 4hd1        | 3.5 1.7 0.0                                 |
| 4hg2            | 4hg1        | 3.5 1.7 0.0                                 |
| 4he1            | 4hg1        | 5.0 3.2 0.0                                 |
| 1ht2            | 1ha or 4he1 | 3.5 1.7 0.0                                 |
| 1ha             | 1hd#*       | 3.5 1.7 0.0                                 |
| 4hd1            | 1hd#*       | 3.5 1.7 0.0                                 |
| 1hb2            | 1hd#*       | 5.0 3.2 0.0                                 |
| 1hb1            | 1hd#*       | 5.0 3.2 0.0                                 |
| 5hb2            | 5ha         | 3.5 1.7 0.0                                 |
| 5hn             | 5hb2        | 5.0 3.2 0.0                                 |
| 5hb1            | 5hb2        | 2.7 0.9 0.0                                 |
| 5h1             | 5hb2        | 2.7 0.9 0.0                                 |
| 1ha             | 1hb2        | 3.5 1.7 0.0                                 |
| 1ha             | 1hb1        | 2.7 0.9 0.0                                 |
| 2hb#            | 5ha         | 2.7 0.9 0.0                                 |
| 5hn             | 5ha         | 3.5 1.7 0.0                                 |
| 5hb1            | 5ha         | 3.5 1.7 0.0                                 |
| 5h1             | 5hb1        | 2.7 0.9 0.0                                 |
| 5hb1            | 2hb#        | 5.0 3.2 0.0                                 |
| 5hn             | 5hb1        | 5.0 3.2 0.0                                 |
| 5h2             | 5hb1        | 3.5 1.7 0.0                                 |
| 3hb1            | 3ha         | 3.5 1.7 0.0                                 |
| 3hn             | 3hb1        | 5.0 3.2 0.0                                 |
| 4hd2            | 4hd1        | 3.5 1.7 0.0                                 |
| 4he2            | 4hd2        | 3.5 1.7 0.0                                 |
| 4he1            | 4hd2        | 3.5 1.7 0.0                                 |
| 2hn             | 1ha         | 5.0 3.2 0.0                                 |
| 2hn             | 2ha         | 3.5 1.7 0.0                                 |
| 2hn             | 2hb#        | 3.5 1.7 0.0                                 |
| 3hn             | 2hn         | 5.0 3.2 0.0                                 |
| 2ha             | 2hb#        | 3.5 1.7 0.0                                 |
| 5hn             | 2hb#        | 3.5 1.7 0.0                                 |
| 3hb2            | 3hg         | 2.7 0.9 0.0                                 |
| 3hb2            | 3ha         | 3.5 1.7 0.0                                 |
| 5hn             | 5h2         | 5.0 3.2 0.0                                 |
| 5hn             | 4hb#        | 3.5 1.7 0.0                                 |
| 5hn             | 5h1         | 2.7 0.9 0.0                                 |
| 3hn             | 3hg         | 3.5 1.7 0.0                                 |
| 3hn             | 3ha         | 5.0 3.2 0.0                                 |
| 3hg             | 3ha         | 2.7 0.9 0.0                                 |
| 3hd1# ou 3hd2#  | 3ha         | 2.7 0.9 0.0                                 |



*Supporting Information*

|      |       |                          |
|------|-------|--------------------------|
| 4he2 | 4he1  | 2.7 0.9 0.0              |
| 4he1 | 4hd1  | 3.5 1.7 0.0              |
| 4he2 | 4hd1  | 3.5 1.7 0.0              |
| 5h2  | 5h1   | 2.7 0.9 0.0              |
| 4ha  | 4hb#  | 3.5 1.7 0.0              |
| 4he1 | 2hn   | 1.8 0.0 0.0 <sup>§</sup> |
| 4he2 | 3hn   | 1.8 0.0 0.0 <sup>§</sup> |
| 1n   | 1hd22 | 2.0 0.2 0.2 <sup>§</sup> |

# Methyl groups with degenerated protons.

\* Not stereospecifically assigned methyl groups.

<sup>§</sup> The analysis of structures indicated the presence of steric clashes between these hydrogen atoms.

Therefore, distances of 1.8 Å and 2.0 ± 0.2 Å were imposed for the final calculation.

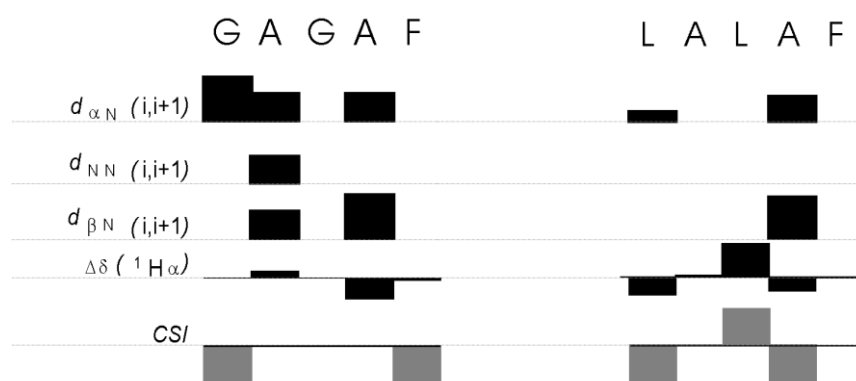

Comparison of the sequential and short-range NOE connectivity and chemical shift indexes (CSI) of the major rotamers of the two cyclic peptides **10a** (left) and **10c** (right).

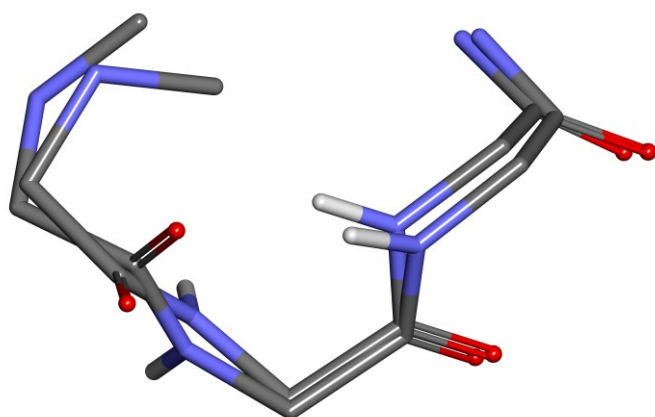

Overlap of backbone heavy atoms of the center member of cluster I of **10c\_down** with the NMR structure of **10c**. A RMSD of 0.55 Å was calculated. Only the 14 heavy atoms constituting the turn, used for superposition and RMSD calculation, are shown.

Catalyst parameter input for conformational search:

```
// Catalyst parameter file
confAnalysis.best.max.successive.failures=1000
confAnalysis.best.torsion.factor=10
sysSearch.sp3sp3SearchOffset=10
sysSearch.sp3sp3SearchIncrement=10
sysSearch.sp3sp2SearchOffset=10
sysSearch.sp3sp2SearchIncrement=10
confAnalysis.fast.systematic.upperbound=10000
confAnalysis.fast.random.nAttempt=1000
confAnalysis.systematicFlipAxialEquatorialMaxRingSize=50
```

Molecular modeling of **10a-c\_cis** isomers.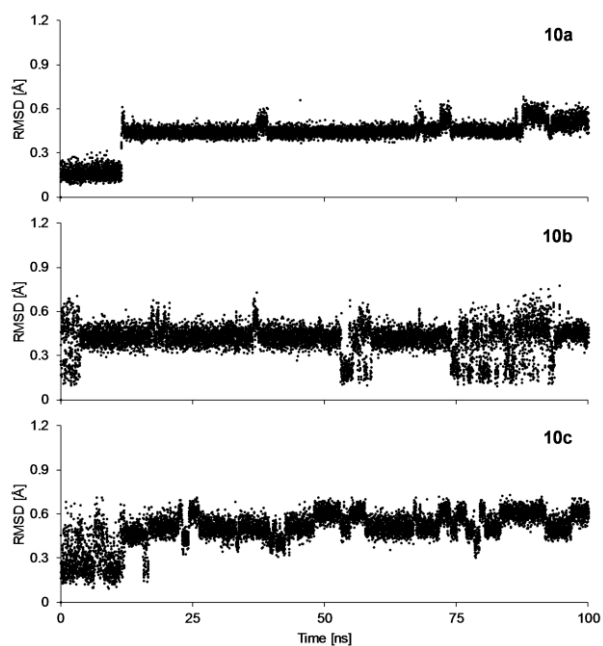

RMSD (Å) versus the first conformation of 10,000 conformations from 100 ns molecular dynamic simulations for macrocyclic peptides **10a-c\_cis**.

Dihedral angles measured in center members of clusters of macrocyclic peptides **10a-c\_cis**.

|            | Cluster <sup>[a]</sup> | $\Phi_{i+1}$ | $\Psi_{i+1}$ | $\Phi_{i+2}$ | $\Psi_{i+2}$ | $\Phi_{i+3}$ | $\Psi_{i+3}$ | $d(\text{Å})^{[b]}$ |
|------------|------------------------|--------------|--------------|--------------|--------------|--------------|--------------|---------------------|
| <b>10a</b> | I (71)                 | 157          | -153         | -68          | -47          | -81          | -136         | 4.5                 |
|            | II (17)                | 117          | -127         | -71          | -48          | -81          | -147         | 4.8                 |
|            | III (12)               | 152          | -127         | -66          | -63          | -96          | -176         | 4.8                 |
| <b>10b</b> | I (66)                 | 71           | -155         | -68          | -64          | -95          | 134          | 5.1                 |
|            | II (16)                | 93           | -175         | -65          | -46          | -94          | 141          | 4.9                 |
|            | III (9)                | 72           | -153         | -55          | -38          | -133         | 111          | 5.2                 |
|            | IV (3)                 | 99           | 160          | -61          | -39          | -107         | 121          | 4.7                 |
|            | V (2)                  | 77           | -172         | -69          | -44          | -114         | 151          | 4.7                 |
|            | VI (2)                 | 72           | -152         | -64          | -61          | -122         | 106          | 5.4                 |
| <b>10c</b> | I (51)                 | -55          | -91          | -81          | -60          | -87          | 136          | 5.2                 |
|            | II (25)                | -97          | -98          | -50          | -52          | -99          | 140          | 5.1                 |
|            | III (9)                | 74           | -132         | -71          | -64          | -102         | 113          | 5.6                 |
|            | IV (3)                 | 67           | -146         | -64          | -77          | -91          | 125          | 5.4                 |
|            | V (3)                  | -75          | -87          | -66          | -64          | -82          | 141          | 5.3                 |
|            | VI (2)                 | 45           | -92          | -74          | -106         | -74          | 126          | 5.9                 |

[a] The cluster size in % is given in parenthesis; [b] d: distance from  $C\alpha_{i+1}$  to  $C\alpha_{i+3}$ .

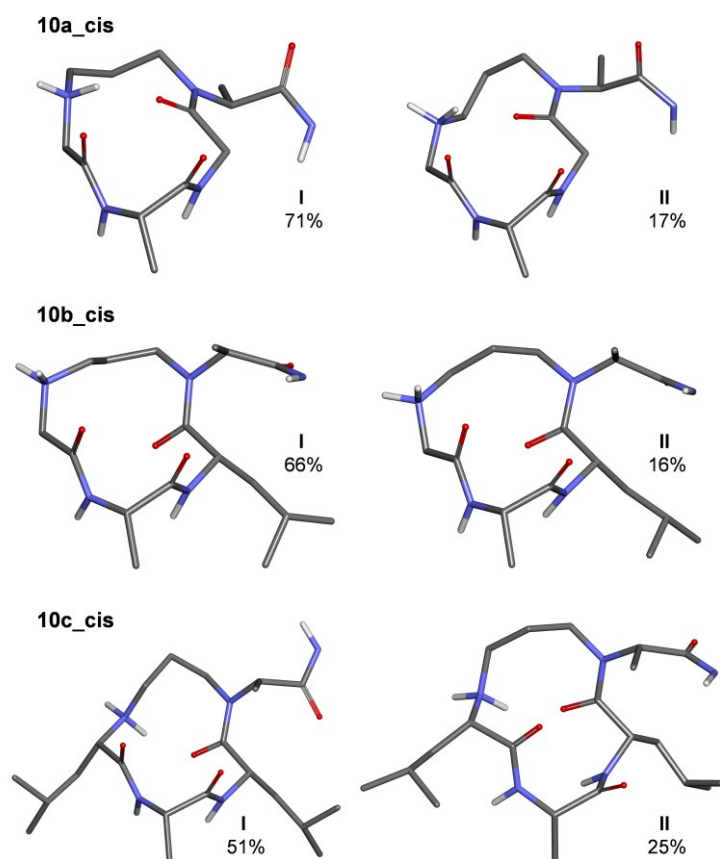

Conformations of the center members of the two major clusters of **10a-c\_cis** identified by molecular dynamic simulations. Cluster sizes are given in %. For clarity, only polar hydrogen atoms are shown, and the phenylalanine 5 amino acid is not represented.

[1] W. F. Vranken, W. Boucher, T. J. Stevens, R. H. Fogh, A. Pajon, M. Llinas, E. L. Ulrich, J. L. Markley, J. Ionides and E. D. Laue, *Proteins* **2005**, *59*, 687-696.
